# Supplementary material for: Two-body wear of occlusal splint materials against different antagonists
Source: Springer Nature journal article supplement (doi:10.1186/s12903-020-01165-9), 2020-06-22
Supplement: MOESM2 [file 18108266]

## Funding

Project summary with funding amounts in Turkish

| PROJE ÖZET                    |                                                                                                                                                              |                                    |                                            |                |              |
|-------------------------------|--------------------------------------------------------------------------------------------------------------------------------------------------------------|------------------------------------|--------------------------------------------|----------------|--------------|
| Proje No [ 7008 ] :           | SAG-C-DRP-100616-0261                                                                                                                                        | Proje Tipi :                       | Lisansüstü Tez Projeleri - Doktora [C-DRP] | Alanı :        | Sağlık       |
| Proje Adı :                   | Dört farklı oklüzal splint materyalinin üç ayrı antagonist karşısındaki aşınma miktarının in vitro olarak çiğneme simülatöründe tespiti ve değerlendirilmesi |                                    |                                            |                |              |
| Başlangıç Tarihi :            | 10.06.2016                                                                                                                                                   | Süresi :                           | 12 Ay                                      | Bitiş Tarihi : | 10.06.2017   |
| Bütçesi :                     | 21.764,32 TL                                                                                                                                                 | Harcanan :                         | 0,00 TL                                    | Kalan :        | 21.764,32 TL |
| Akademik :<br>(2 Akademisyen) | Yürütücü: %60 Prof.Dr. YASEMİN KULAK ÖZKAN<br>Araştırmacı: %40 Doktora Öğr. Fatma Kübra Yıldız                                                               |                                    |                                            |                |              |
| Durumu :                      | BAPKO kararı: OLUMLU                                                                                                                                         |                                    |                                            |                |              |
| PROJE RAPORLARI               |                                                                                                                                                              |                                    |                                            |                |              |
|                               | Durumu                                                                                                                                                       | Raporun Gönderilmesi Gereken Tarih | Raporun Gönderildiği Tarih                 | Rapor Dosyası  | #            |
| Nihal Rapor                   | Bekleniyor                                                                                                                                                   | 13.06.2017                         |                                            |                |              |

Project number: SAG-C-DRP-100616-0261    Project type: PhD Study    Field: Health  
Project name: Two-Body Wear Determination and Evaluation of Four Different Occlusal Splint Materials Against Three Different Antagonists in Chewing Simulator  
Starting Date: 10.06.2016    Duration: 12 Months    Ending Date: 10.06.17  
Academicians: Prof Dr Yasemin Kulak Ozkan 60%  
                    PhD Student Fatma Kubra Yildiz  
Decision: Accepted
