# Supplementary material for: Two-body wear of occlusal splint materials against different antagonists
Source: Springer Nature journal article supplement (doi:10.1186/s12903-020-01165-9), 2020-06-22
Supplement: MOESM3 [file 18108266]

|                             | eclipse 1 | eclipse 2 | eclipse 3 | eclipse 4 | eclipse 5 | eclipse 6 | eclipse 7 | eclipse 8 | thermocycle |
|-----------------------------|-----------|-----------|-----------|-----------|-----------|-----------|-----------|-----------|-------------|
| 1 10000 cycle ips e max pre | 0,1116    | 0,1794    | 0,1161    | 0,1853    | 0,1556    | 0,1044    | 0,1094    | 0,1046    | thermocycle |
| 2 10000 cycle enamel        | 0,0896    | 0,1062    | 0,1500    | 0,0903    | 0,0851    | 0,1068    | 0,0154    | 0,1334    | thermocycle |
| 3 10000 cycle inCoris TZI C | 0,0116    | 0,1275    | 0,1560    | 0,1430    | 0,0906    | 0,1130    | 0,1100    | 0,1374    | thermocycle |
| 4 20000 cycle ips e max pre | 0,3832    | 0,3613    | 0,3850    | 0,3117    | 0,3358    | 0,3808    | 0,3446    | 0,3919    | thermocycle |
| 5 20000 cycle enamel        | 0,2997    | 0,2251    | 0,2496    | 0,2574    | 0,2314    | 0,1490    | 0,4859    | 0,2128    | thermocycle |
| 6 20000 cycle inCoris TZI C | 0,2192    | 0,1972    | 0,5013    | 0,2997    | 0,4022    | 0,2314    | 0,5272    | 0,2178    | thermocycle |
| 7 30000 cycle ips e max pre | 0,7275    | 0,7331    | 0,8338    | 0,7784    | 0,7200    | 0,7386    | 0,8227    | 0,7428    | thermocycle |
| 8 30000 cycle enamel        | 0,5421    | 0,5347    | 0,4665    | 0,6013    | 0,4432    | 0,5670    | 0,5272    | 0,5645    | thermocycle |
| 9 30000 cycle inCoris TZI C | 0,4613    | 0,3796    | 0,3101    | 0,4268    | 0,3384    | 0,3817    | 0,4022    | 0,4432    | thermocycle |

|                             | sr ivocap heat | sr ivocap heat | sr ivocap heat | sr ivocap heat | sr ivocap heat | sr ivocap heat | sr ivocap heat | sr ivocap heat | thermocycle |
|-----------------------------|----------------|----------------|----------------|----------------|----------------|----------------|----------------|----------------|-------------|
| 1 10000 cycle ips e max pre | 0,0847         | 0,0959         | 0,0743         | 0,0958         | 0,1046         | 0,1261         | 0,1290         | 0,0955         | thermocycle |
| 2 10000 cycle enamel        | 0,0329         | 0,0381         | 0,0668         | 0,0409         | 0,0678         | 0,0679         | 0,0862         | 0,0638         | thermocycle |
| 3 10000 cycle inCoris TZI C | 0,0214         | 0,0295         | 0,0295         | 0,0076         | 0,0286         | 0,0324         | 0,0137         | 0,0103         | thermocycle |
| 4 20000 cycle ips e max pre | 0,2223         | 0,2965         | 0,4728         | 0,2032         | 0,2468         | 0,2676         | 0,4464         | 0,2065         | thermocycle |
| 5 20000 cycle enamel        | 0,1443         | 0,1646         | 0,1811         | 0,1308         | 0,1989         | 0,2761         | 0,1957         | 0,1824         | thermocycle |
| 6 20000 cycle inCoris TZI C | 0,1470         | 0,1294         | 0,1317         | 0,1399         | 0,1374         | 0,2136         | 0,2299         | 0,4136         | thermocycle |
| 7 30000 cycle ips e max pre | 0,6013         | 0,7805         | 0,7442         | 0,8415         | 0,9990         | 0,6625         | 0,9238         | 0,5289         | thermocycle |
| 8 30000 cycle enamel        | 0,4895         | 0,6133         | 0,4747         | 0,4042         | 0,5353         | 0,5519         | 0,592          | 0,5439         | thermocycle |
| 9 30000 cycle inCoris TZI C | 0,1800         | 0,2021         | 0,1675         | 0,2378         | 0,1967         | 0,2854         | 0,2062         | 0,2128         | thermocycle |

|                             | valplast 1 | valplast 2 | valplast 3 | valplast 4 | valplast 5 | valplast 6 | valplast 7 | valplast 8 | thermocycle |
|-----------------------------|------------|------------|------------|------------|------------|------------|------------|------------|-------------|
| 1 10000 cycle ips e max pre | 0,0824     | 0,0810     | 0,0864     | 0,0992     | 0,0706     | 0,0945     | 0,0639     | 0,0615     | thermocycle |
| 2 10000 cycle enamel        | 0,0549     | 0,0396     | 0,0555     | 0,0632     | 0,0427     | 0,0465     | 0,0526     | 0,0225     | thermocycle |
| 3 10000 cycle inCoris TZI C | 0,0203     | 0,0149     | 0,0273     | 0,01       | 0,0305     | 0,0352     | 0,0126     | 0,0248     | thermocycle |
| 4 20000 cycle ips e max pre | 0,1752     | 0,1652     | 0,2365     | 0,1771     | 0,2710     | 0,1689     | 0,1954     | 0,0654     | thermocycle |
| 5 20000 cycle enamel        | 0,1218     | 0,0989     | 0,1467     | 0,1192     | 0,1041     | 0,1044     | 0,1357     | 0,1217     | thermocycle |
| 6 20000 cycle inCoris TZI C | 0,0915     | 0,1004     | 0,0391     | 0,0397     | 0,0354     | 0,0900     | 0,0772     | 0,0060     | thermocycle |
| 7 30000 cycle ips e max pre | 0,5150     | 0,4720     | 0,4763     | 0,8770     | 0,2701     | 0,2677     | 0,3399     | 0,2327     | thermocycle |
| 8 30000 cycle enamel        | 0,3660     | 0,2765     | 0,3298     | 0,2249     | 0,2620     | 0,2070     | 0,1570     | 0,1928     | thermocycle |
| 9 30000 cycle inCoris TZI C | 0,2017     | 0,1779     | 0,1357     | 0,2000     | 0,1507     | 0,1201     | 0,1789     | 0,1464     | thermocycle |

|                             | sr ivocap elast | sr ivocap elast | sr ivocap elast | sr ivocap elast | sr ivocap elast | sr ivocap elast | sr ivocap elast | sr ivocap elast | thermocycle |
|-----------------------------|-----------------|-----------------|-----------------|-----------------|-----------------|-----------------|-----------------|-----------------|-------------|
| 1 10000 cycle ips e max pre | 0,0636          | 0,0758          | 0,0773          | 0,111           | 0,1118          | 0,0903          | 0,1068          | 0,1334          | thermocycle |
| 2 10000 cycle enamel        | 0,0517          | 0,0308          | 0,0463          | 0,0353          | 0,0588          | 0,0561          | 0,0568          | 0,0706          | thermocycle |
| 3 10000 cycle inCoris TZI C | 0,0012          | 0,0214          | 0,0063          | 0,0039          | 0,0143          | 0,0147          | 0,0033          | 0,0123          | thermocycle |
| 4 20000 cycle ips e max pre | 0,1693          | 0,1450          | 0,1702          | 0,1532          | 0,289           | 0,1473          | 0,1996          | 0,1663          | thermocycle |
| 5 20000 cycle enamel        | 0,1173          | 0,191           | 0,1149          | 0,1128          | 0,1203          | 0,1013          | 0,1075          | 0,1145          | thermocycle |
| 6 20000 cycle inCoris TZI C | 0,0621          | 0,0639          | 0,0479          | 0,0478          | 0,0424          | 0,0548          | 0,0561          | 0,0424          | thermocycle |
| 7 30000 cycle ips e max pre | 0,7028          | 0,6795          | 0,6870          | 0,7348          | 0,8640          | 0,7309          | 0,9690          | 0,7810          | thermocycle |
| 8 30000 cycle enamel        | 0,4928          | 0,3480          | 0,4690          | 0,4887          | 0,4906          | 0,5858          | 0,6233          | 0,1231          | thermocycle |
| 9 30000 cycle inCoris TZI C | 0,2877          | 0,2974          | 0,2290          | 0,2412          | 0,1883          | 0,2430          | 0,2959          | 0,3909          | thermocycle |

ips e max press valplaste 960000 cycle 0,001  
 ips e max press eclipse e l 960000 cycle 0,001  
 ips e max press sr ivocap 960000 cycle 0,005  
 ips e max press SR Ivocap 960000 cycle 0,002

enamel valplaste karşı 960000 cycle 0,3756

|                                          |        |
|------------------------------------------|--------|
| enamel SR Ivocap a karşı 960000 cycle    | 0,1149 |
| enamel eclipse e karşı 960000 cycle      | 0,1063 |
| enamel sr ivocap elastom 960000 cycle    | 0,0637 |
| inCoris TZI C verteskse kç 960000 cycle  | 0,0127 |
| inCoris TZI C eclipse e kar 960000 cycle | 0,0457 |
| inCoris TZI C SR Ivocap a l 960000 cycle | 0,0253 |
| inCoris TZI C sr ivocap ela 960000 cycle | 0,0126 |

| eclipse 9 | eclipse 10 | eclipse 11 | eclipse 12 | eclipse 13 | eclipse 14 | eclipse 15 | eclipse 16 |
|-----------|------------|------------|------------|------------|------------|------------|------------|
| 0,1192    | 0,1387     | 0,0388     | 0,2450     | 0,1261     | 0,0958     | 0,0561     | 0,0234     |
| 0,0590    | 0,0847     | 0,0524     | 0,0636     | 0,0668     | 0,1192     | 0,0646     | 0,1062     |
| 0,0646    | 0,0951     | 0,0626     | 0,1044     | 0,1044     | 0,2122     | 0,0665     | 0,0527     |
| 0,0955    | 0,1290     | 0,3101     | 0,3850     | 0,2504     | 0,2468     | 0,1046     | 0,1128     |
| 0,1103    | 0,2854     | 0,4268     | 0,5169     | 0,4959     | 0,4464     | 0,2307     | 0,0796     |
| 0,2437    | 0,2965     | 0,3832     | 0,4431     | 0,4069     | 0,5439     | 0,3796     | 0,0897     |
| 0,8140    | 0,9124     | 0,7497     | 0,8781     | 0,6363     | 0,5169     | 0,5569     | 0,8140     |
| 0,5840    | 0,4859     | 0,5272     | 0,5645     | 0,6404     | 0,6411     | 0,5670     | 0,1429     |
| 0,3799    | 0,3563     | 0,4726     | 0,3799     | 0,4073     | 0,4447     | 0,1213     | 0,1464     |

sr ivocap hea sr ivocap heat c sr ivocap hea sr ivocap hea sr ivocap heat sr ivocap heat c sr ivocap hea sr ivocap heat cure 16

|        |        |        |        |        |        |        |        |
|--------|--------|--------|--------|--------|--------|--------|--------|
| 0,1426 | 0,1045 | 0,0916 | 0,0951 | 0,0941 | 0,0958 | 0,0957 | 0,1388 |
| 0,0826 | 0,0525 | 0,0633 | 0,0514 | 0,0524 | 0,0641 | 0,0561 | 0,0548 |
| 0,0243 | 0,0040 | 0,0289 | 0,0028 | 0,0478 | 0,0373 | 0,0374 | 0,0120 |
| 0,2919 | 0,4989 | 0,2969 | 0,4337 | 0,3384 | 0,2691 | 0,3355 | 0,0467 |
| 0,2955 | 0,3637 | 0,3701 | 0,2830 | 0,3341 | 0,2297 | 0,1774 | 0,2205 |
| 0,0959 | 0,4546 | 0,2955 | 0,2830 | 0,2223 | 0,3489 | 0,4665 | 0,1051 |
| 0,5160 | 0,6621 | 0,5460 | 0,8857 | 0,9665 | 0,7730 | 0,8591 | 0,7116 |
| 0,5423 | 0,5569 | 0,7710 | 0,6411 | 0,5673 | 0,8140 | 0,6124 | 0,7238 |
| 0,2130 | 0,2263 | 0,3365 | 0,2468 | 0,4703 | 0,4837 | 0,4464 | 0,4337 |

valplast 9 valplast 10 valplast 11 valplast 12 valplast 13 valplast 14 valplast 15 valplast 16

|        |        |        |        |        |        |        |        |
|--------|--------|--------|--------|--------|--------|--------|--------|
| 0,0696 | 0,0659 | 0,0660 | 0,0527 | 0,0563 | 0,0427 | 0,0601 | 0,0686 |
| 0,0406 | 0,0466 | 0,0390 | 0,0288 | 0,0399 | 0,0297 | 0,0467 | 0,0421 |
| 0,0147 | 0,0323 | 0,0154 | 0,0174 | 0,0118 | 0,0286 | 0,0099 | 0,0281 |
| 0,1295 | 0,0659 | 0,1275 | 0,1284 | 0,0666 | 0,0706 | 0,1163 | 0,1269 |
| 0,1334 | 0,1387 | 0,1428 | 0,1783 | 0,0867 | 0,0709 | 0,1207 | 0,1279 |
| 0,1349 | 0,1503 | 0,1440 | 0,1796 | 0,1249 | 0,0767 | 0,1208 | 0,1353 |
| 0,3997 | 0,1452 | 0,1752 | 0,3678 | 0,2893 | 0,2178 | 0,2340 | 0,2365 |
| 0,1820 | 0,1455 | 0,1412 | 0,1219 | 0,1868 | 0,2563 | 0,1665 | 0,2362 |
| 0,1464 | 0,1273 | 0,1213 | 0,1213 | 0,1567 | 0,1517 | 0,1412 | 0,1541 |

sr ivocap ela: sr ivocap elasto sr ivocap elas sr ivocap elas sr ivocap elasto sr ivocap elasto sr ivocap elas sr ivocap elastomer 16

|        |        |        |         |        |        |        |        |
|--------|--------|--------|---------|--------|--------|--------|--------|
| 0,1199 | 0,1432 | 0,1168 | 0,1213  | 0,0836 | 0,1118 | 0,1880 | 0,0781 |
| 0,0606 | 0,0429 | 0,0710 | 0,0594  | 0,0465 | 0,0594 | 0,0686 | 0,0360 |
| 0,0111 | 0,0112 | 0,0071 | 0,0149  | 0,0075 | 0,0160 | 0,0271 | 0,0348 |
| 0,2282 | 0,2412 | 0,1883 | 0,2950  | 0,1982 | 0,1981 | 0,1880 | 0,4859 |
| 0,1075 | 0,1483 | 0,1145 | 0,1497  | 0,1840 | 0,1639 | 0,1473 | 0,1741 |
| 0,0779 | 0,0749 | 0,1062 | 0,11483 | 0,1000 | 0,0979 | 0,0918 | 0,0938 |
| 0,9790 | 0,1653 | 0,1752 | 0,1820  | 0,1455 | 0,1412 | 0,1219 | 0,1357 |
| 0,6260 | 0,6692 | 0,4710 | 0,4839  | 0,6390 | 0,4790 | 0,3600 | 0,3906 |
| 0,3090 | 0,2030 | 0,1517 | 0,1412  | 0,4010 | 0,3906 | 0,1369 | 0,2220 |
